# Supplementary material
Source: Springer Nature journal article supplement (https://www.springermedizin.de/resource/supplementary/12871_2008_63_MOESM2_ESM.pdf/9429580)

Cz-Average Ref

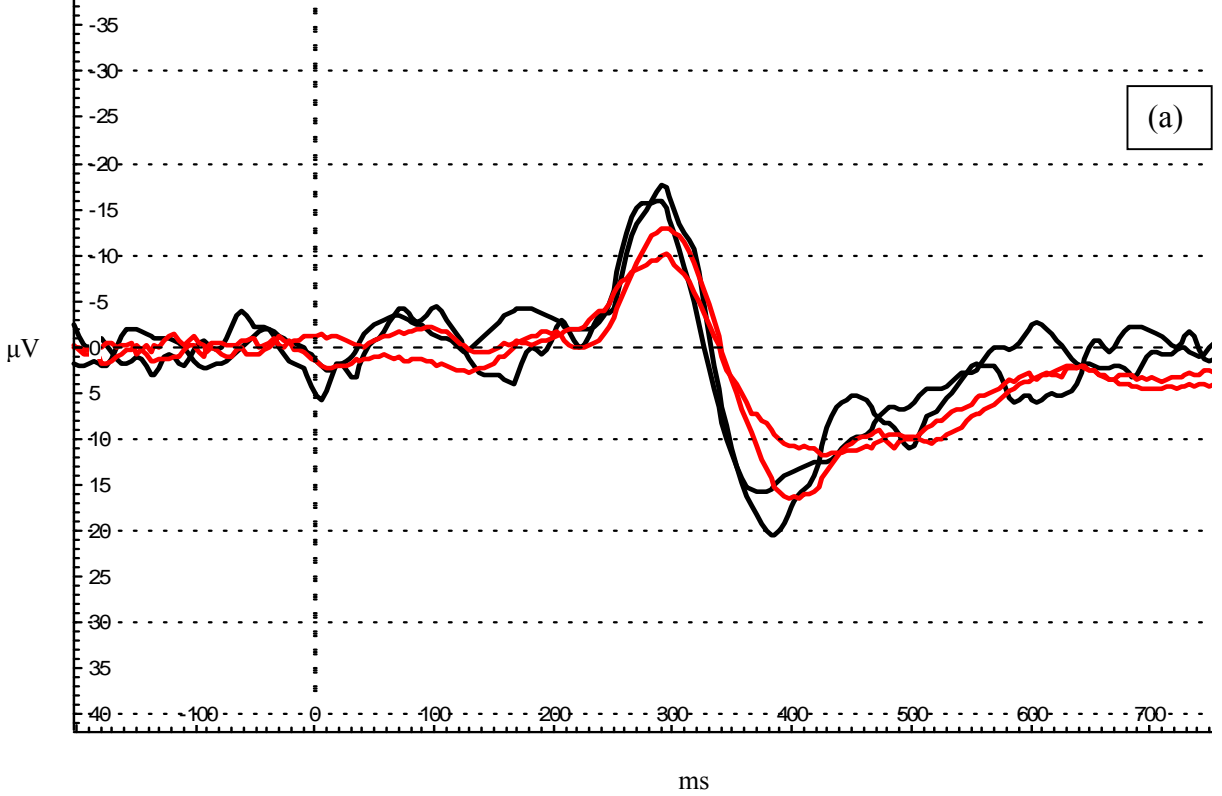

Cz-Average Ref

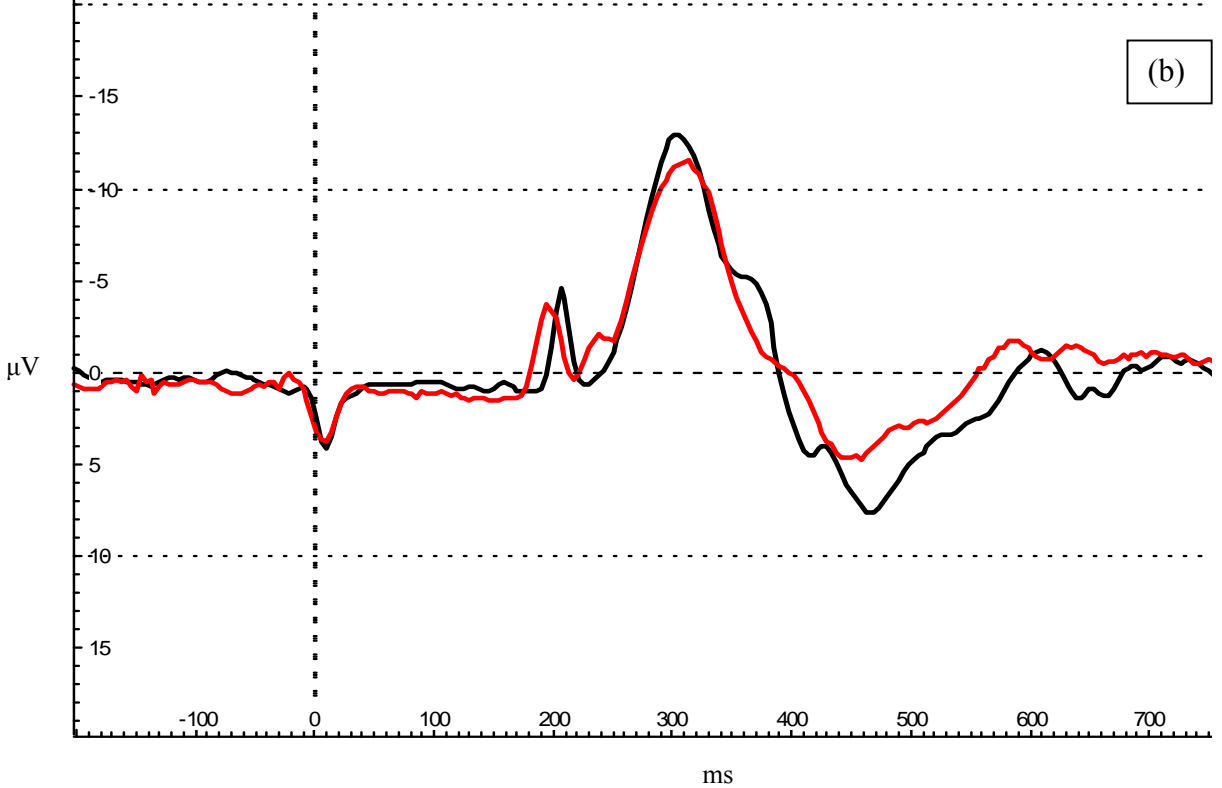

Supplement: MOESM2 [file 9429580]
